# Supplementary material
Source: PubMed Central journal article supplement (PMC4974361)
Supplement: 10.1074_M116.730440_jbc.M116.730440-1.pdf [file 10.1074_M116.730440_jbc.M116.730440-1.pdf]

### Supplementary data:

PKC epsilon Promotes Synaptogenesis through Membrane Accumulation of the Postsynaptic Density Protein PSD-95

**Abhik Sen, Jarin Hongpaisan, Desheng Wang, Thomas J. Nelson and Daniel L. Alkon.**

Blanchette Rockefeller Neurosciences Institute,  
8 Medical Center Drive, Morgantown, WV 26505, USA.

### Supplementary figure legend:

**Supplemental Figure 1: PKC $\epsilon$  induced increase in synapse number is independent of neuronal density.** **A.** Confocal images of untreated, DCPLA-ME (100 nM), and bryostatin 1 (0.27 nM), treated primary human neurons (10 days). Each condition is represented by seven panels. Six square panels represents nucleus (DAPI-blue), NeuN positive neurons (magenta), merged for DAPI and NeuN, PSD-95 (green), synaptophysin (red) and merged image from nucleus, PSD-95 and synaptophysin respectively. The rectangular panel represents magnified image of a 40 $\mu$ m neurite. **B.** Number of NeuN positive cells normalized to number of DAPI stained nucleus. Bryostatin 1 and DCPLA-ME treatment do not affect the number of neurons. **C.** Synapses were quantified by the number of colocalized PSD-95 and synaptophysin signals. PKC $\epsilon$  activation increased synapse number ( $F_{(2,30)}=19.73$ ; ANOVA  $P<0.0001$ ,  $n=10$  neurites). Data are represented as mean  $\pm$  SE of at least three independent experiments (Student's t-test, \* $P<0.05$  and \*\* $P<0.005$ ).

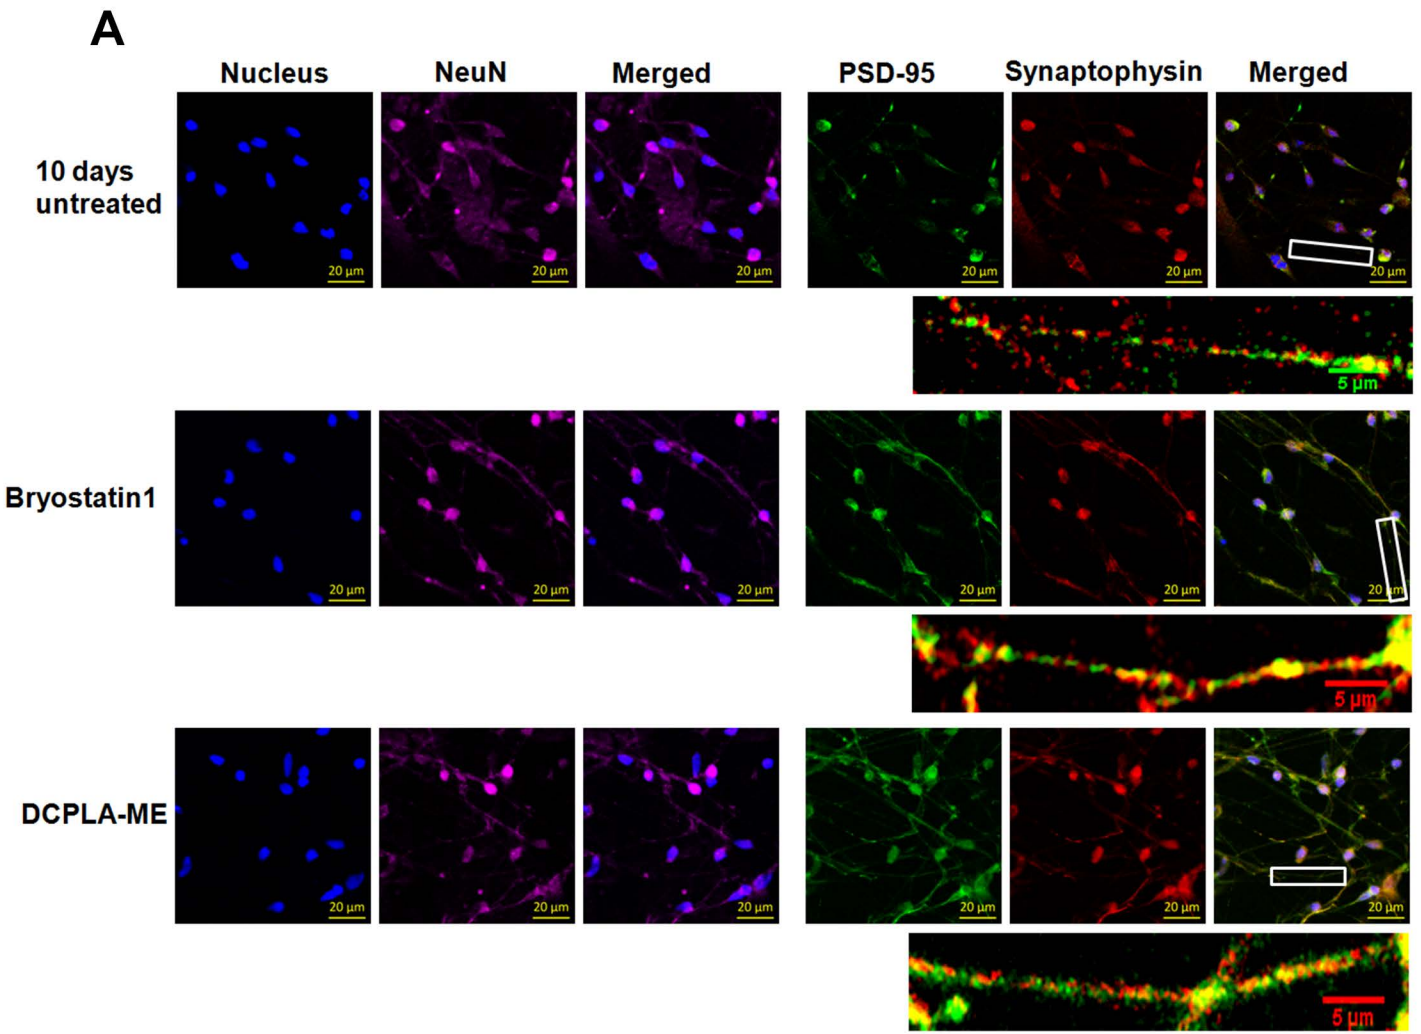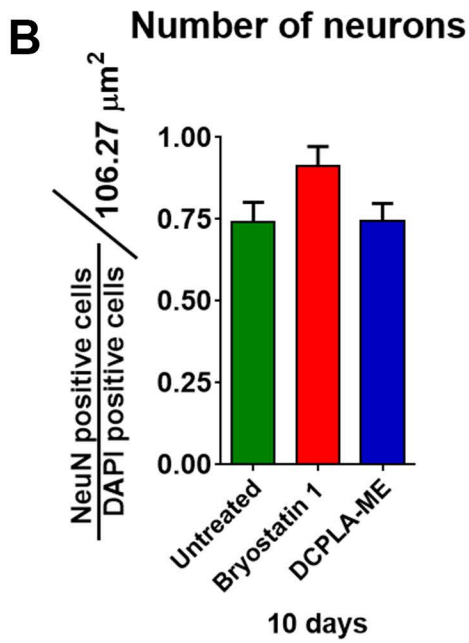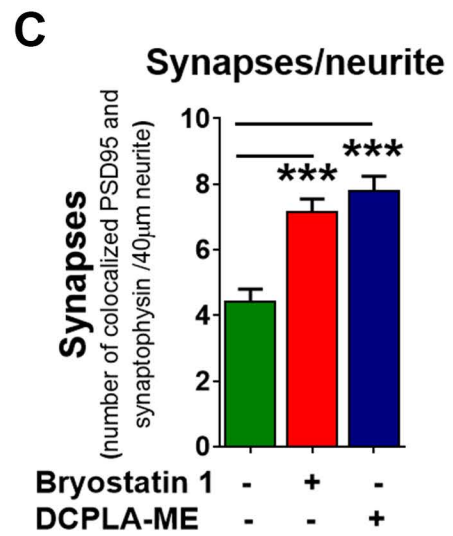

Supplementary Figure .1
